# Supplementary material for: Development and Usability Evaluation of a Facebook-Based Intervention Program for Childhood Cancer Patients: Mixed Methods Study
Source: PubMed Central journal article supplement (PMC7420636; doi:10.2196/18779), 2020-07-28
Supplement: jmir_v22i7e18779_app2.pdf [file jmir_v22i7e18779_app2.pdf]

## Appendix 2. Healthy Teens for Soaam screenshots

Screenshot 1: Homepage and Module 8 about Family issues – It included links to short video clips about sibling issue that is mentioned in the module contents.

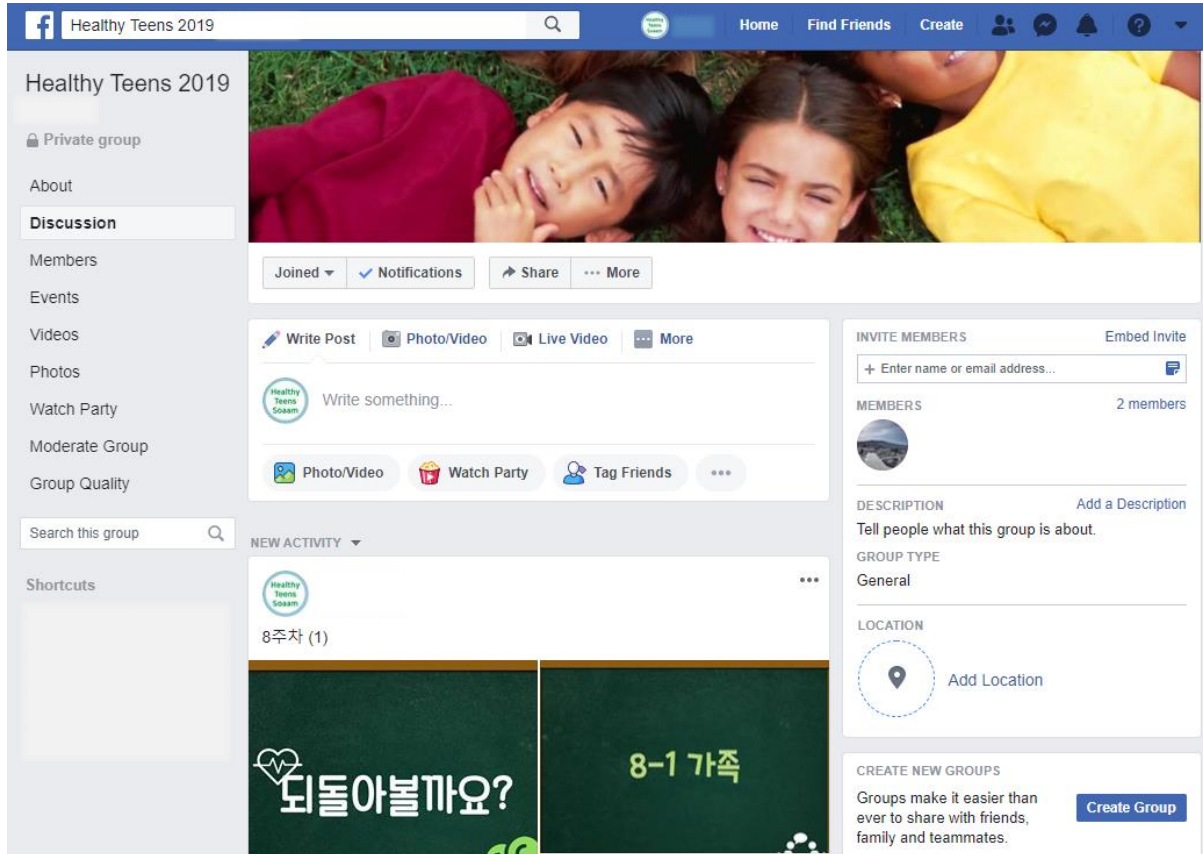

Screenshot 2-3: Module 3 about Diagnostic tests – It delivered information of imaging tests and included pictures and links to short video clips of taking MRI exam.

Screenshot 2

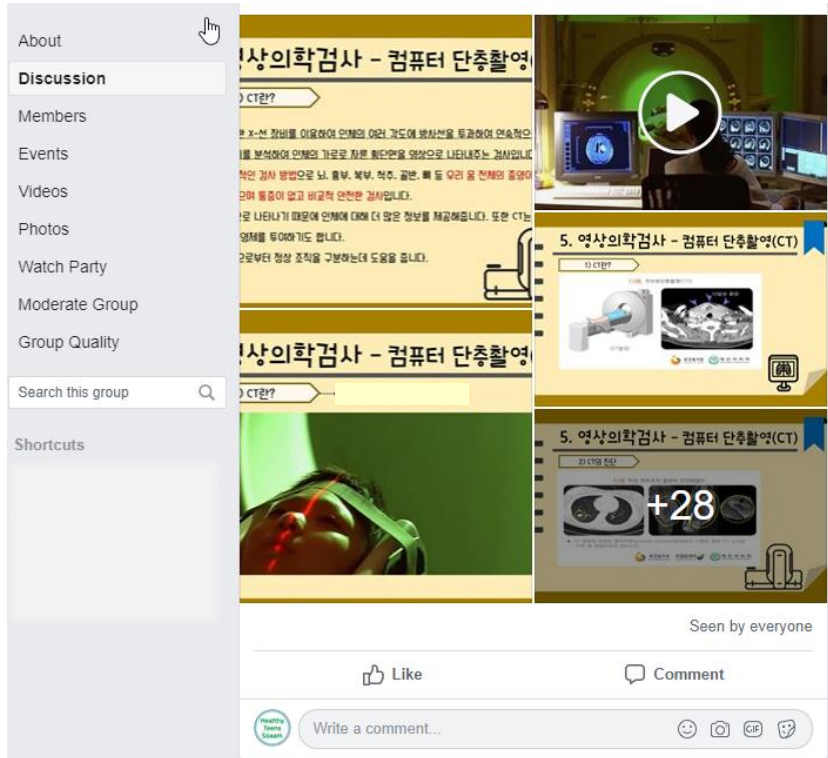

Screenshot 3

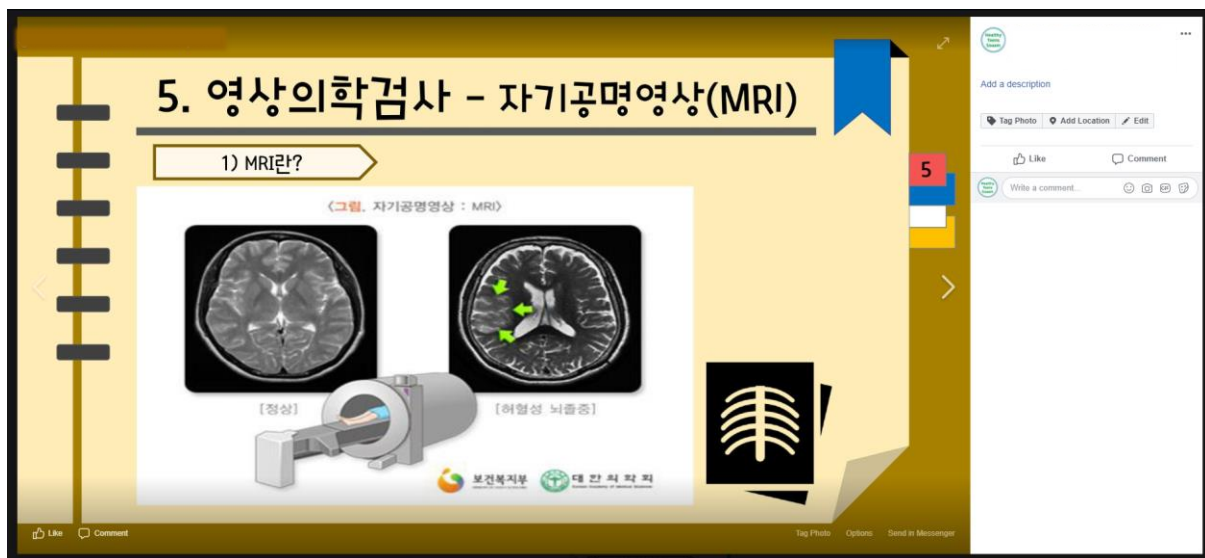

Screenshot 4: Module 2 about Types of pediatric cancers and their characteristics – It delivered information of various types of cancer with pictures.

Private group

About

**Discussion**

Members

Events

Videos

Photos

Watch Party

Moderate Group

Group Quality

Search this group

Shortcuts

**4) 연조직육종의 역할**

연조직육종은 뼈를 제외한 모든 조직에서 발생할 수 있는 종양이다. 발생률은 약 50%를 차지하며, 청소년기에 가장 많이 발생하는 연조직육종이다.

| 종류    | 비율 (%) |
|-------|--------|
| 근육종   | 3.4%   |
| 지방종   | 3.9%   |
| 신경종   | 1.9%   |
| 신경섬유종 | 2.4%   |
| 지방근종  | 4.2%   |
| 신경관종  | 7.2%   |
| 신경관종  | 9.5%   |
| 신경관종  | 17.9%  |
| 신경관종  | 22.5%  |

**5) 골종양의 역할 & 합병증**

골종양은 뼈에서 발생하는 종양이다. 발생률은 약 10-15%를 차지하며, 청소년기에 가장 많이 발생하는 골종양이다.

| 종류  | 비율 (%) |
|-----|--------|
| 골종양 | 1.1%   |
| 골종양 | 1.1%   |
| 골종양 | 1.1%   |
| 골종양 | 1.1%   |
| 골종양 | 1.1%   |
| 골종양 | 1.1%   |
| 골종양 | 1.1%   |
| 골종양 | 1.1%   |
| 골종양 | 1.1%   |
| 골종양 | 1.1%   |

**4) 연조직육종의 치료 & 합병증**

연조직육종의 치료는 종양의 종류와 위치에 따라 다르다. 수술, 방사선 치료, 화학 요법 등이 사용된다. 합병증으로는 통증, 기능 장애, 재발 등이 있다.

**5) 골종양의 치료**

골종양의 치료는 종양의 종류와 위치에 따라 다르다. 수술, 방사선 치료, 화학 요법 등이 사용된다. 합병증으로는 통증, 기능 장애, 재발 등이 있다.

**6) 간종양의 역할**

간종양은 간에서 발생하는 종양이다. 발생률은 약 1-2%를 차지하며, 청소년기에 가장 많이 발생하는 간종양이다.

| 종류  | 비율 (%) |
|-----|--------|
| 간종양 | 1.1%   |
| 간종양 | 1.1%   |
| 간종양 | 1.1%   |
| 간종양 | 1.1%   |
| 간종양 | 1.1%   |
| 간종양 | 1.1%   |
| 간종양 | 1.1%   |
| 간종양 | 1.1%   |
| 간종양 | 1.1%   |
| 간종양 | 1.1%   |

Seen by everyone

Like Comment

Write a comment...
